# Supplementary material for: Assessing Risks from Cyclones for Human Lives and Livelihoods in the Coastal Region of Bangladesh
Source: MDPI journal article supplement (doi:10.3390/ijerph14080831), 2017-07-25
Supplement: s1 [file s1]

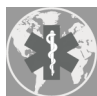

## Supplementary Materials

# Assessing Risks from Cyclones for Human Lives and Livelihoods in the Coastal Region of Bangladesh

Mohammad Abdul Quader <sup>1,2,\*</sup>, Amanat Ullah Khan <sup>3</sup> and Matthieu Kervyn <sup>1</sup>

**Table S1.** The description of the land covers classes and their relative ranking to exposure.

| Land cover classes | Description                                                                                                                                | Relative exposure to cyclone and tidal surge* |
|--------------------|--------------------------------------------------------------------------------------------------------------------------------------------|-----------------------------------------------|
| Cultivable land    | Land used for agriculture, dry firm land                                                                                                   | 7                                             |
| Forest             | Land cover with trees and vegetation cover over 30%                                                                                        | 3                                             |
| Grass land         | Natural grass over 10%                                                                                                                     | 5                                             |
| Shrub land         | Land covered with shrubs over 30%                                                                                                          | 4                                             |
| Wet land           | Land covered with wetland, trees, mangroves                                                                                                | 2                                             |
| Water bodies       | Water bodies in the land area including river and pond...                                                                                  | 6                                             |
| Artificial surface | Land modified by human activities including settlement, industrial area, transport facilities, interior urban green zones and water bodies | 8                                             |
| Barren land        | Land with less than 10% vegetation cover, saline and alkaline land, sandy field                                                            | 1                                             |

\*1 denotes lowest exposure
